# Supplementary material for: Histone methyltransferases EHMT1 and EHMT2 (GLP/G9A) maintain PARP inhibitor resistance in high-grade serous ovarian carcinoma
Source: PubMed Central journal article supplement (PMC6882350; doi:10.1186/s13148-019-0758-2), 2019-11-27
Supplement: 13148_2019_758_MOESM4_ESM.pdf [file 13148_2019_758_MOESM4_ESM.pdf]

**Supplementary Table 1. shRNA**

| shRNA     | The RNAi Consortium No.     | pLKO.1 Insert Sequence                                      |
|-----------|-----------------------------|-------------------------------------------------------------|
| shControl | N/A (Sigma-Aldrich #SHC016) | CCGGGCGCGATAGCGCTAATAATTTCTCGAGAAATTATTAGCGCTATCGCGCTTTTT   |
| shEHMT1#1 | TRCN0000229325              | CCGGCCTCGGTTCTGAGTCGTATAACTCGAGTTATACGACTCAGAACCGAGGTTTTTG  |
| shEHMT1#2 | TRCN0000229326              | CCGGGGATTTCAGATGTCACCTTAAACTCGAGTTTAAGGTGACATCTGAATCCTTTTTG |
| shEHMT2#1 | TRCN0000115667              | CCGGCACACATTCTGACCAGAGATCTCGAGATCTCTGGTCAGGAATGTGTGTTTTTG   |
| shEHMT2#2 | TRCN0000115670              | CCGGCGAGAGAGTTCATGGCTCTTTCTCGAGAAAGAGCCATGAACTCTCTCGTTTTTG  |

**Supplementary Table 2. Primers**

| Name     | Sequence                | Usage                           |
|----------|-------------------------|---------------------------------|
| B2M-F    | GGCATTCTGAAGCTGACA      | Control ( $\Delta\Delta$ Ct)    |
| B2M-R    | CTTCAATGTCGGATGGATGAAAC | Control ( $\Delta\Delta$ Ct)    |
| EHMT1-F  | CCTCGACTCGGAAAAACCCA    | Gene expression                 |
| EHMT1-R  | AGTTGGGGTCAATTCCGTCC    | Gene expression                 |
| EHMT2-F  | ATAGCAAGGAGGAGGACGGTT   | Gene expression                 |
| EHMT2-R  | CCTCGATGTGCTTGTGCTCT    | Gene expression                 |
| GAPDH-F  | GTCTCCTCTGACTTCAACAGCG  | Control ( $\Delta\Delta$ Ct)    |
| GAPDH-R  | ACCACCCTGTTGCTGTAGCCAA  | Control ( $\Delta\Delta$ Ct)    |
| ZNF644-F | ATTCTCCGATGCAGGTTTTGTG  | Gene expression                 |
| ZNF644-R | GCTGCTTCGGCCATTAGTAGA   | Gene expression                 |
| I-SceI-F | CCGTTCTCGTGATGAAGGTAAG  | Transfection efficiency control |
| I-SceI-R | CACTGATCGTACAGCAGACATAC | Transfection efficiency control |
| CLDN4-F  | GCCTTACTCCGCCAAGTATT    | gDNA loading control            |
| CLDN4-R  | AGGGAAGAACAAGCAGAGAG    | gDNA loading control            |

**Supplementary Table 3. Antibodies**

| Protein           | Species | Supplier and Catalog # | Use      | Dilution        | WB Blocking              | WB Detection             |
|-------------------|---------|------------------------|----------|-----------------|--------------------------|--------------------------|
| Total H3          | Rb      | Cell Signaling 4499    | WB       | 1:1000          | LI-COR <sup>1</sup>      | Fluorescent <sup>3</sup> |
| H3K9me1           | Rb      | Millipore 07-450       | WB       | 1:1000          | LI-COR                   | Fluorescent              |
| H3K9me2           | Ms      | Abcam ab1220           | WB<br>IF | 1:1000<br>1:200 | LI-COR                   | Fluorescent              |
| H3K14ac           | Rb      | Cell Signaling 7627    | WB       | 1:1000          | LI-COR                   | Fluorescent              |
| H3K27me3          | Rb      | Cell Signaling 9733    | WB       | 1:1000          | LI-COR                   | Fluorescent              |
| γH2AX             | Ms      | Millipore 05-636       | IF       | 1:400           |                          |                          |
| B-actin           | Ms      | Abcam ab6276           | WB       | 1:10,000        | LI-COR                   | Fluorescent              |
| EHMT1             | Rb      | Bethyl A301-642A       | WB       | 1:500           | 5% BSA/TBST <sup>2</sup> | HRP <sup>4</sup>         |
| EHMT2             | Rb      | Cell Signaling 3306    | WB       | 1:1000          | 5% BSA/TBST              | HRP                      |
| CDC25C            | Rb      | Cell Signaling 4688    | WB       | 1:1000          | 5% BSA/TBST              | HRP                      |
| p-CDC25C (Ser216) | Rb      | Cell Signaling 9528    | WB       | 1:1000          | 5% BSA/TBST              | HRP                      |
| Cyclin A          | Ms      | Neomarkers MS-473-P0   | WB       | 1:1000          | 5% BSA/TBST              | HRP                      |
| Cyclin B1         | Ms      | Santa Cruz SC-245      | WB       | 1:1000          | 5% BSA/TBST              | HRP                      |
| p-MPM2            | Ms      | Upstate 05-368         | WB       | 1:1000          | 5% BSA/TBST              | HRP                      |
| p-H3(Ser28)       | Rb      | Cell Signaling 9713    | WB       | 1:1000          | 5% BSA/TBST              | HRP                      |

WB = Western Blot

IF = Immunofluorescence

<sup>1</sup> All blocking and incubations in Odyssey buffer (LI-COR #927-50000)

<sup>2</sup> Blocking and primary antibody incubation in 5% BSA/TBST. Secondary incubation in 5% milk/TBST.

<sup>3</sup> Detection by LI-COR fluorophore-labeled secondary goat anti-rabbit (IRDye 680RD or IRDye 800CW, #925-68071 or #926-32211) or goat anti-mouse (IRDye 680RD or IRDye 800CW, #926-68070 or #925-32210) antibodies. Used at 1:20,000 dilution.

<sup>4</sup> Detection by Cell Signaling HRP-conjugated secondary goat anti-rabbit (Cell Signaling #7074) or goat anti-mouse (Cell Signaling #7076). Used at 1:5000 dilution.
